# Supplementary material
Source: publisher figshare collection journal article supplement (https://geolsoc.figshare.com/ndownloader/files/36235989)
Supplement: Supplementary file 1 [file 36235989]

## Sheet: DataCruncher_WAM (3)
Analysis	Age	Error	# cycles integrated	179Hf/177Hf	2se	178Hf/177Hf	2se	171Yb/173Yb	2se	174Hf/177Hf	2se	176Lu/177Hf	2se	176Hf/177Hf	2se	176Hf/177Hf t	eHfi	2se internal	TDM Hf	CR
R.5793.2_01	79.12	0.09	113	0.738461	6.6115e-05	1.47924	8.10855e-05	0.87641	0.000171036	0.0829965	0.00292397	0.00271782	0.000136355	0.282681	1.43429e-05	0.282677	-2.05424	0.507284	0.875579	796.459
R.5793.2_02	79.12	0.09	113	0.738858	3.68308e-05	1.48003	6.83192e-05	0.876073	0.000169526	0.0866395	0.00234142	0.00319155	0.000105306	0.282701	1.12894e-05	0.282696	-1.37476	0.399287	0.838156	759.036
R.5793.2_03	79.12	0.09	113	0.738851	4.426e-05	1.48	7.54949e-05	0.875924	0.000181256	0.058641	0.00175744	0.00232222	4.8099e-05	0.282697	1.26258e-05	0.282694	-1.47811	0.446553	0.84385	764.73
R.5793.2_04	79.12	0.09	88	0.738951	6.45144e-05	1.48019	9.01795e-05	0.875745	0.00015186	0.0928379	0.00173439	0.00332824	0.000113707	0.2827	1.45353e-05	0.282695	-1.44068	0.514085	0.841788	762.668
R.5793.2_05	79.12	0.09	113	0.738879	4.87178e-05	1.48008	7.24572e-05	0.875694	0.000137676	0.097327	0.00247158	0.00326916	0.000124944	0.282697	1.17169e-05	0.282692	-1.52147	0.414403	0.846239	767.119
R.5793.2_06	79.12	0.09	90	0.738806	5.96216e-05	1.47987	9.21236e-05	0.875775	0.000140494	0.0838958	0.00287536	0.00316813	5.88583e-05	0.282676	1.51896e-05	0.282672	-2.24984	0.537229	0.886347	807.227
R.5793.2_07	79.12	0.09	110	0.738521	5.8749e-05	1.47933	9.40207e-05	0.876223	0.000160423	0.0824512	0.000865266	0.0031095	5.89993e-05	0.282691	1.27186e-05	0.282686	-1.73823	0.449833	0.858177	779.057
R.5793.2_08	79.12	0.09	110	0.738541	6.12052e-05	1.47936	8.62387e-05	0.876203	0.000158649	0.0839272	0.00205905	0.00305576	0.000116543	0.282697	1.38196e-05	0.282693	-1.50452	0.488776	0.845304	766.184
R.5793.2_09	79.12	0.09	110	0.738492	5.17281e-05	1.47929	7.83895e-05	0.876148	0.000109725	0.108991	0.00324973	0.00427733	4.11155e-05	0.282688	1.28156e-05	0.282682	-1.89076	0.453262	0.866578	787.458
R.5793.2_10	79.12	0.09	105	0.738583	4.04089e-05	1.47947	6.73859e-05	0.876259	0.000151134	0.0909186	0.000766452	0.00352431	4.74794e-05	0.282697	1.35016e-05	0.282692	-1.5253	0.477527	0.84645	767.33
PRR-6034_02	81.4	0.16	110	0.739262	7.71132e-05	1.48074	0.000133057	0.874751	0.000234791	0.142162	0.00459471	0.00469135	9.39056e-05	0.282947	1.87193e-05	0.28294	7.28722	0.662066	0.360665	279.265
PRR-6034_03	81.4	0.16	8	0.738507	0.00011164	1.4791	0.000255302	0.872423	0.00245743	0.0309668	0.00316379	9.80615e-05	7.26772e-05	0.282941	5.2341e-05	0.28294	7.30699	1.85124	0.359566	278.166
PRR-6034_04	81.4	0.16	34	0.738912	0.000150705	1.47992	0.000226994	0.874076	0.00144867	0.117222	0.0272691	0.00289841	0.000782442	0.282898	4.44152e-05	0.282893	5.64103	1.5709	0.4521	370.7
PRR-6034_05	81.4	0.16	110	0.739172	0.000109154	1.48056	0.000155976	0.875319	0.000168278	0.19998	0.00452953	0.00621864	7.26114e-05	0.282922	1.85501e-05	0.282913	6.31989	0.656075	0.414413	333.013
PRR-6034_06	81.4	0.16	110	0.739168	8.89268e-05	1.48057	0.000139392	0.875393	0.000133131	0.236161	0.00457262	0.00707992	0.000118911	0.282963	2.35468e-05	0.282952	7.70871	0.832793	0.33723	255.83
PRR-6034_07	81.4	0.16	105	0.739295	0.000109266	1.48082	0.000173236	0.873203	0.00652495	0.065765	0.0132346	0.00348661	0.000471793	0.282829	3.24675e-05	0.282823	3.16245	1.14832	0.589474	508.074
PRR-6034_08	81.4	0.16	108	0.739369	8.26445e-05	1.48098	0.000139802	0.875159	0.000146541	0.231531	0.00311231	0.00704278	4.36582e-05	0.282954	2.50253e-05	0.282943	7.38986	0.885085	0.354959	273.559
PRR-6034_10	81.4	0.16	110	0.739335	9.40698e-05	1.48097	0.000124807	0.874391	0.000197123	0.137929	0.00149654	0.00460575	8.50837e-05	0.282965	2.2364e-05	0.282958	7.92917	0.790971	0.324967	243.567
R.5905.4_01	91.53	0.11	116	0.738697	5.18473e-05	1.4797	7.90423e-05	0.876133	0.000139063	0.0737211	0.0022387	0.0030674	4.52547e-05	0.282698	1.28663e-05	0.282692	-1.24594	0.455068	0.841295	749.765
R.5905.4_02	91.53	0.11	116	0.738243	6.03149e-05	1.47883	8.88425e-05	0.87658	0.000143296	0.0943545	0.00233485	0.00360171	7.92004e-05	0.282689	1.2139e-05	0.282683	-1.58932	0.429344	0.860213	768.683
R.5905.4_03	91.53	0.11	116	0.738625	5.25525e-05	1.4796	7.46129e-05	0.876352	0.000135901	0.102096	0.00741299	0.00223123	0.000289056	0.282691	1.35741e-05	0.282687	-1.42547	0.480105	0.851187	759.657
R.5905.4_04	91.53	0.11	93	0.738412	4.37534e-05	1.47913	7.9475e-05	0.876576	0.00014241	0.0899937	0.00257336	0.00302344	0.000130615	0.282701	1.22711e-05	0.282696	-1.11065	0.434018	0.83384	742.31
R.5905.4_05	91.53	0.11	116	0.738401	5.28761e-05	1.47912	7.94999e-05	0.876454	0.000151877	0.106372	0.00491279	0.00445029	0.000143156	0.282681	1.30796e-05	0.282673	-1.93131	0.462609	0.879048	787.518
R.5905.4_06	91.53	0.11	116	0.73857	5.68432e-05	1.47947	8.7122e-05	0.876491	0.000181707	0.05992	0.00244922	0.00196341	8.95384e-05	0.282698	1.27939e-05	0.282695	-1.15827	0.452511	0.836464	744.934
R.5905.4_07	91.53	0.11	83	0.73857	5.58357e-05	1.47947	0.000100329	0.876496	0.000132251	0.121331	0.00429066	0.00419825	0.000219678	0.282713	1.21317e-05	0.282706	-0.761733	0.429083	0.814608	723.078
R.5905.4_08	91.53	0.11	116	0.738627	4.34038e-05	1.47955	6.79766e-05	0.876378	0.000115059	0.104414	0.00455238	0.00425211	9.54085e-05	0.282714	1.15252e-05	0.282707	-0.728258	0.407634	0.812762	721.232
R.5905.4_09	91.53	0.11	93	0.738661	3.89555e-05	1.47966	5.97362e-05	0.876142	0.000118055	0.10447	0.00281642	0.00373279	8.79389e-05	0.282699	1.16227e-05	0.282692	-1.25148	0.411083	0.841601	750.071
R.5905.4_10	91.53	0.11	113	0.738432	5.08647e-05	1.47923	7.64833e-05	0.876445	0.000144079	0.0974256	0.00266436	0.0035399	6.14627e-05	0.282684	1.11234e-05	0.282678	-1.74942	0.393423	0.869031	777.501
J6.307.1_f08	100.71	0.23	73	0.738237	5.00384e-05	1.47873	0.000117059	0.876366	0.000107442	0.124593	0.00480083	0.00376989	0.00010961	0.282798	1.35061e-05	0.282791	2.44882	0.477705	0.644885	544.175
J6.307.1_h08	100.71	0.23	108	0.738399	3.48677e-05	1.4791	9.44837e-05	0.876234	0.000151199	0.0722965	0.00385097	0.00249319	7.43622e-05	0.282791	1.13106e-05	0.282786	2.27567	0.400056	0.654462	553.752
J6.307.1_h12	100.71	0.23	53	0.738337	4.13526e-05	1.47901	0.000107649	0.876211	0.000131249	0.115724	0.00237896	0.00337419	0.000112312	0.282803	1.43429e-05	0.282797	2.66432	0.507305	0.632964	532.254
J6.307.1_h13	100.71	0.23	93	0.738174	3.72737e-05	1.47858	9.71826e-05	0.876388	0.000106656	0.14333	0.00361274	0.00308678	0.000120374	0.282793	1.20983e-05	0.282787	2.31196	0.427914	0.652455	551.745
J6.307.1_i07	100.71	0.23	113	0.73841	4.05862e-05	1.47916	8.18836e-05	0.87614	0.000146186	0.0691478	0.00307905	0.00187341	9.96085e-05	0.282796	1.1488e-05	0.282793	2.51462	0.406331	0.641246	540.536
J6.307.1_i09	100.71	0.23	113	0.738352	4.00958e-05	1.47897	8.91804e-05	0.876192	9.13411e-05	0.129111	0.00286158	0.00372305	7.26018e-05	0.282797	1.09319e-05	0.28279	2.40064	0.386658	0.647551	546.841
J6.307.1_i11	100.71	0.23	113	0.738317	4.09471e-05	1.47889	9.38072e-05	0.876298	0.0001268	0.0999349	0.00202852	0.00284437	6.77339e-05	0.282793	1.1366e-05	0.282788	2.33946	0.402012	0.650935	550.225
J6.307.1_i12	100.71	0.23	80	0.73832	5.57237e-05	1.47891	0.000111512	0.876315	0.000119512	0.102035	0.00350496	0.00266844	0.00010446	0.282807	1.22002e-05	0.282802	2.83892	0.431518	0.623303	522.593
PRR-5998_d05	104.58	0.21	30	0.740317	4.8942e-05	1.48307	0.000175112	0.874515	0.000104279	0.127758	0.00491199	0.00470181	0.000265655	0.282765	1.67146e-05	0.282756	1.2863	0.59119	0.712342	607.762
PRR-5998_d07	104.58	0.21	78	0.740579	4.4674e-05	1.48351	8.33195e-05	0.874058	0.000112063	0.132353	0.00251175	0.00474464	9.92185e-05	0.282776	9.92695e-06	0.282767	1.68762	0.351112	0.690166	585.586
PRR-5998_d11	104.58	0.21	39	0.740523	5.5449e-05	1.48341	0.000194323	0.874165	0.000109857	0.185748	0.00522357	0.00641877	0.000279693	0.282783	1.87701e-05	0.282771	1.82471	0.663885	0.682588	578.008
PRR-5998_e07	104.58	0.21	59	0.740508	2.43976e-05	1.48338	9.05901e-05	0.874165	0.000125895	0.126816	0.00319236	0.00441396	9.65983e-05	0.282776	1.24966e-05	0.282767	1.69086	0.442002	0.689986	585.406
PRR-5998_e08	104.58	0.21	91	0.740674	2.99153e-05	1.48369	6.4666e-05	0.873809	6.78161e-05	0.199017	0.00304768	0.00666698	8.52235e-05	0.282759	1.39208e-05	0.282746	0.953548	0.492365	0.730723	626.143
PRR-5998_e09	104.58	0.21	105	0.740534	2.3836e-05	1.48345	6.79378e-05	0.874023	8.40847e-05	0.186242	0.0058792	0.00548657	0.000153759	0.282782	1.05613e-05	0.282771	1.84486	0.373547	0.681474	576.894
PRR-5998_f06	104.58	0.21	100	0.740475	4.3647e-05	1.48325	8.06541e-05	0.874012	6.51428e-05	0.393382	0.00795499	0.0101414	4.53245e-05	0.282797	1.66386e-05	0.282777	2.03388	0.588478	0.671024	566.444
PRR-5998_f07	104.58	0.21	25	0.740647	9.49809e-05	1.48385	0.000584208	0.874181	0.000226782	0.128521	0.00249715	0.00459901	0.000140258	0.282771	3.20758e-05	0.282762	1.49827	1.13451	0.70063	596.05
PRR-5998_f10	104.58	0.21	79	0.740463	3.52296e-05	1.48326	8.47888e-05	0.873928	0.000103927	0.123669	0.00323975	0.00401333	0.000103662	0.282752	1.1291e-05	0.282745	0.895231	0.399361	0.733943	629.363
J6.297.1_f09	105.59	0.62	70	0.738984	2.89235e-05	1.48028	8.85141e-05	0.875791	7.60837e-05	0.5653	0.0393168	0.0114432	0.000460415	0.282881	2.27703e-05	0.282858	4.94103	0.805339	0.510878	405.288
J6.297.1_f12	105.59	0.62	24	0.739192	8.37558e-05	1.4807	0.000330959	0.875668	0.000163518	0.455092	0.0114905	0.00970608	0.000299704	0.282858	2.82867e-05	0.282839	4.24298	1.00046	0.549575	443.985
J6.297.1_f13	105.59	0.62	115	0.738826	2.62209e-05	1.47998	5.39525e-05	0.875938	0.000112244	0.128936	0.0023049	0.00365392	6.74946e-05	0.282794	1.09161e-05	0.282787	2.41201	0.386101	0.650946	545.356
J6.297.1_f14	105.59	0.62	90	0.738612	3.47764e-05	1.47951	7.54158e-05	0.87633	0.000176051	0.0996777	0.00503819	0.00352351	0.000118457	0.282795	1.3454e-05	0.282788	2.45481	0.475869	0.648579	542.989
J6.297.1_g08	105.59	0.62	95	0.738661	2.38102e-05	1.47963	6.87843e-05	0.876104	0.000172264	0.0816242	0.00237153	0.00214639	7.93105e-05	0.282794	1.34536e-05	0.282789	2.49777	0.475859	0.646202	540.612
J6.297.1_g09	105.59	0.62	70	0.738595	3.02954e-05	1.4795	8.0327e-05	0.876119	0.000147541	0.108031	0.0048863	0.00298707	0.000160365	0.282804	1.51414e-05	0.282799	2.82513	0.535554	0.628091	522.501
J6.297.1_g12	105.59	0.62	85	0.738779	3.27496e-05	1.47992	7.91091e-05	0.876048	0.000138276	0.120544	0.00260845	0.00347915	6.21789e-05	0.282989	1.18441e-05	0.282982	9.31422	0.418924	0.267804	162.214
J6.297.1_g14	105.59	0.62	40	0.738839	4.18451e-05	1.48001	0.000118806	0.875854	0.000181596	0.160806	0.0165701	0.00455694	0.000371888	0.282756	2.19984e-05	0.282747	1.00874	0.778078	0.728507	622.917
J6.297.1_i13	105.59	0.62	25	0.738987	6.52877e-05	1.48029	0.000282565	0.875949	0.000152696	0.127676	0.00514057	0.0039123	6.86772e-05	0.28274	1.81006e-05	0.282733	0.49523	0.640216	0.756862	651.272
PRR-5994_01	111.63	0.39	108	0.73911	8.77608e-05	1.4805	0.000116411	0.873333	0.000544301	0.0579226	0.00213743	0.00256886	5.96402e-05	0.282612	2.1218e-05	0.282607	-3.81635	0.750495	0.999328	887.698
PRR-5994_02	111.63	0.39	98	0.737245	9.28043e-05	1.47658	0.000251874	0.876825	0.000323304	0.154084	0.00392525	0.00507917	0.000152253	0.282689	3.30926e-05	0.282678	-1.29072	1.17048	0.860343	748.713
PRR-5994_03	111.63	0.39	98	0.737693	6.54612e-05	1.47756	0.000160519	0.874361	0.00204353	0.0363839	0.00450289	0.00013802	0.000219372	0.28275	3.21738e-05	0.282749	1.2191	1.13803	0.721868	610.238
PRR-5994_06	111.63	0.39	65	0.73915	9.75522e-05	1.48039	0.000229339	0.874293	0.000484813	0.139598	0.0111523	0.00472346	0.000325468	0.282657	3.14779e-05	0.282648	-2.38219	1.11338	0.920451	808.821
PRR-5994_07	111.63	0.39	100	0.738993	7.92044e-05	1.48024	0.00019497	0.874869	0.00282316	0.033612	0.0118021	0.00301379	0.000520358	0.282792	3.36462e-05	0.282786	2.51922	1.19008	0.649996	538.366
PRR-5994_08	111.63	0.39	100	0.739371	9.11784e-05	1.48089	0.000148359	0.874227	0.000343847	0.100902	0.00370753	0.00347578	9.33931e-05	0.282712	2.38261e-05	0.282705	-0.354248	0.842738	0.808716	697.086
PRR-5994_09	111.63	0.39	95	0.739238	0.000100801	1.48068	0.000160917	0.875374	0.000183037	0.235554	0.0068162	0.00784048	0.000116303	0.282693	2.52852e-05	0.282677	-1.3374	0.894318	0.862914	751.284
PRR-5994_10	111.63	0.39	95	0.739093	8.68966e-05	1.48047	0.000193592	0.874655	0.000258346	0.10248	0.000702962	0.00354457	6.79404e-05	0.282752	2.57538e-05	0.282744	1.04623	0.910922	0.731418	619.788
PRR-5992_01	111.67	0.28	108	0.74058	2.55024e-05	1.48348	5.55843e-05	0.874105	0.000132386	0.118457	0.00349382	0.00475996	0.00012643	0.282763	1.32896e-05	0.282753	1.36203	0.470056	0.714005	602.335
PRR-5992_02	111.67	0.28	60	0.740461	3.80986e-05	1.48319	8.19812e-05	0.874277	0.000149416	0.0984341	0.0138999	0.00332518	0.000446567	0.282691	1.39264e-05	0.282684	-1.08162	0.492582	0.848853	737.183
PRR-5992_03	111.67	0.28	120	0.73994	2.96722e-05	1.48218	5.25375e-05	0.874604	9.6664e-05	0.162401	0.00106592	0.00600594	2.82636e-05	0.282765	1.20949e-05	0.282752	1.32716	0.427794	0.715931	604.261
PRR-5992_04	111.67	0.28	115	0.740454	2.8014e-05	1.48323	5.23804e-05	0.874159	0.000120735	0.124629	0.00978205	0.00383862	0.000341048	0.282765	1.15673e-05	0.282757	1.48403	0.409137	0.707264	595.594
PRR-5992_05	111.67	0.28	115	0.740079	2.79979e-05	1.48249	5.78206e-05	0.874483	9.05885e-05	0.185557	0.00559321	0.00728426	0.000151647	0.282772	1.22633e-05	0.282756	1.46602	0.433746	0.708259	596.589
PRR-5992_06	111.67	0.28	115	0.740017	2.64906e-05	1.48239	6.2942e-05	0.874595	0.000103576	0.128726	0.00442272	0.00429897	0.000157824	0.282748	1.19622e-05	0.282739	0.843783	0.423106	0.742632	630.962
PRR-5992_07	111.67	0.28	115	0.739991	3.02611e-05	1.4823	5.39002e-05	0.874457	0.000141798	0.0881119	0.000963172	0.00356594	4.55162e-05	0.282732	1.09859e-05	0.282725	0.35097	0.388575	0.769839	658.169
PRR-5992_08	111.67	0.28	115	0.740262	2.68677e-05	1.48286	5.22748e-05	0.874414	0.000236523	0.0539841	0.00174965	0.00230476	5.6001e-05	0.282737	1.07141e-05	0.282732	0.596421	0.378965	0.75629	644.62
PRR-5992_09	111.67	0.28	112	0.740588	2.13178e-05	1.4835	5.50243e-05	0.874262	0.000103792	0.0940788	0.0034187	0.00329794	0.000104713	0.282762	8.68721e-06	0.282755	1.43315	0.307271	0.710075	598.405
PRR-5992_10	111.67	0.28	112	0.739933	2.76133e-05	1.4822	5.99041e-05	0.874577	0.000118575	0.122561	0.00482826	0.0038609	0.000185645	0.282745	1.22736e-05	0.282737	0.795696	0.434121	0.745287	633.617
N11.3.1_m08	112.39	0.09	110	0.73814	3.26813e-05	1.47857	5.96329e-05	0.876574	0.00013759	0.0816773	0.00168276	0.00284401	3.96018e-05	0.282638	1.16669e-05	0.282632	-2.91244	0.412665	0.950254	837.864
N11.3.1_m09	112.39	0.09	110	0.738162	2.93343e-05	1.47857	5.93816e-05	0.8767	0.000247149	0.0495224	0.00154866	0.0015427	5.83788e-05	0.282677	1.1888e-05	0.282673	-1.44966	0.42049	0.869727	757.337
N11.3.1_m11	112.39	0.09	100	0.738079	4.06432e-05	1.47844	8.04967e-05	0.876588	0.000148821	0.081487	0.00548006	0.0021778	0.000286332	0.282639	1.19757e-05	0.282634	-2.83259	0.423592	0.945862	833.472
N11.3.1_m12	112.39	0.09	85	0.73765	2.51105e-05	1.47754	7.24914e-05	0.877211	0.000187612	0.0839176	0.00724963	0.00325552	0.000210541	0.282628	1.15955e-05	0.282621	-3.28951	0.410141	0.970993	858.603
N11.3.1_m13	112.39	0.09	50	0.737275	3.7737e-05	1.47677	0.000123859	0.877498	0.000277026	0.074018	0.00104794	0.0025231	0.000106501	0.282631	1.67881e-05	0.282625	-3.15289	0.593809	0.96348	851.09
N11.3.1_n08	112.39	0.09	20	0.737229	7.19922e-05	1.47663	0.000226889	0.877644	0.000366697	0.0593951	0.00588906	0.00186983	0.000140442	0.282602	1.34312e-05	0.282598	-4.1111	0.475075	1.01615	903.762
N11.3.1_n09	112.39	0.09	33	0.737089	6.01808e-05	1.47636	0.000177893	0.877816	0.000240839	0.223879	0.0231532	0.00500706	0.000396683	0.282542	2.90184e-05	0.282532	-6.46534	1.02638	1.14534	1032.95
N11.3.1_n10	112.39	0.09	115	0.737588	3.14781e-05	1.4774	6.63084e-05	0.877249	9.8784e-05	0.127235	0.0049736	0.00447633	0.000154449	0.282707	1.13666e-05	0.282697	-0.612568	0.40204	0.823589	711.199
N11.3.1_n12	112.39	0.09	115	0.737528	2.86443e-05	1.47733	6.53578e-05	0.876975	0.000211678	0.0614748	0.00214786	0.0020401	8.19753e-05	0.282634	1.05572e-05	0.28263	-2.98669	0.373418	0.954339	841.949
N11.3.1_n14	112.39	0.09	108	0.737419	2.64041e-05	1.47707	7.83873e-05	0.877129	0.000165895	0.0909361	0.00438386	0.00344972	0.000101294	0.282616	1.14299e-05	0.282609	-3.72272	0.404281	0.994809	882.419
N11.3.1_o05	112.39	0.09	110	0.737215	2.90389e-05	1.4767	6.09718e-05	0.877548	0.000211271	0.0710343	0.00180672	0.00220212	7.66912e-05	0.282607	1.36751e-05	0.282602	-3.97727	0.4837	1.0088	896.409
N11.3.1_o07	112.39	0.09	110	0.73816	3.68637e-05	1.47857	6.14791e-05	0.876356	0.000142288	0.0898103	0.00236344	0.00335056	8.90403e-05	0.282611	1.05057e-05	0.282604	-3.89135	0.371593	1.00408	891.687
N11.3.1_o11	112.39	0.09	120	0.738531	2.65589e-05	1.47932	6.14133e-05	0.876108	0.000133305	0.0851539	0.00136201	0.00257038	6.83322e-05	0.282625	1.09198e-05	0.28262	-3.3502	0.386242	0.97433	861.94
N11.3.1_p05	112.39	0.09	48	0.738461	5.40305e-05	1.47928	0.000114694	0.876563	0.000192412	0.0703654	0.00082334	0.00269329	0.000163159	0.28265	1.93891e-05	0.282644	-2.47973	0.685806	0.926445	814.055
N11.3.1_p07	112.39	0.09	110	0.737277	3.17433e-05	1.4768	6.94322e-05	0.877652	0.000166308	0.0786653	0.00203331	0.00293271	3.8712e-05	0.282622	1.21038e-05	0.282615	-3.50406	0.428118	0.98279	870.4
N11.3.1_p09	112.39	0.09	105	0.737142	3.54482e-05	1.47652	7.5205e-05	0.87782	0.000219273	0.0566338	0.00233101	0.00226325	6.36154e-05	0.282626	1.19988e-05	0.282622	-3.28604	0.424406	0.970802	858.412
N11.3.1_p10	112.39	0.09	105	0.738379	2.99553e-05	1.47898	6.41838e-05	0.876166	8.09481e-05	0.190122	0.00568639	0.00519207	0.000133949	0.282655	1.23365e-05	0.282644	-2.49682	0.436343	0.927386	814.996
N11.3.1_p11	112.39	0.09	115	0.738418	2.85863e-05	1.47912	0.000112855	0.875999	0.000169456	0.0817054	0.00295699	0.0026919	7.43971e-05	0.282621	1.33802e-05	0.282615	-3.51646	0.473268	0.983471	871.081
N11.3.1_p12	112.39	0.09	118	0.737931	3.05691e-05	1.47811	6.49282e-05	0.876628	0.000137682	0.100396	0.00183626	0.00318547	0.000101589	0.282652	8.78278e-06	0.282645	-2.43998	0.310652	0.924258	811.868
N11.3.1_p13	112.39	0.09	118	0.737593	2.57024e-05	1.47743	6.95032e-05	0.877024	0.000121898	0.0979267	0.00189313	0.00324414	7.82897e-05	0.282638	1.08004e-05	0.282631	-2.95786	0.382015	0.952753	840.363
N11.8.1_b05	113.08	0.19	116	0.738168	4.46582e-05	1.47864	0.000100115	0.876272	0.000126335	0.122064	0.00738672	0.00315993	0.000173046	0.282576	1.21605e-05	0.282569	-5.1178	0.430123	1.072	958.923
N11.8.1_b07	113.08	0.19	116	0.738192	4.50297e-05	1.47865	9.24553e-05	0.876191	0.00011995	0.102929	0.00156267	0.00329144	3.94976e-05	0.282609	1.20083e-05	0.282602	-3.97723	0.424739	1.00937	896.286
N11.8.1_b09	113.08	0.19	98	0.738334	4.88018e-05	1.47893	9.57276e-05	0.876361	0.000146256	0.097847	0.00155701	0.00258833	5.20313e-05	0.282562	1.22525e-05	0.282557	-5.56317	0.433381	1.09644	983.362
N11.8.1_b10	113.08	0.19	98	0.7382	3.39594e-05	1.47878	7.99154e-05	0.8764	0.000128895	0.112386	0.0044868	0.00359199	0.000124612	0.282614	1.30616e-05	0.282607	-3.79297	0.461997	0.999239	886.159
N11.8.1_b11	113.08	0.19	108	0.738365	3.8195e-05	1.47906	7.29868e-05	0.876113	0.000173095	0.0623928	0.00253016	0.00249905	9.28848e-05	0.282587	1.05972e-05	0.282582	-4.66364	0.37483	1.04707	933.99
N11.8.1_b12	113.08	0.19	93	0.738337	3.29096e-05	1.47897	9.77468e-05	0.876229	0.000126531	0.103544	0.00335045	0.00295548	0.000107855	0.282595	1.16174e-05	0.282589	-4.42148	0.410913	1.03377	920.692
N11.8.1_b14	113.08	0.19	93	0.738462	6.24222e-05	1.4792	0.00010047	0.875971	0.000105544	0.0905616	0.00156687	0.00299575	3.25881e-05	0.282573	1.34577e-05	0.282567	-5.1966	0.476006	1.07633	963.248
N11.8.1_d05	113.08	0.19	116	0.738202	4.05168e-05	1.47871	0.000104766	0.876278	0.0001721	0.110338	0.00862082	0.00422707	0.000244623	0.282608	1.22386e-05	0.282599	-4.07934	0.432882	1.01498	901.896
N11.8.1_d08	113.08	0.19	116	0.738183	3.83634e-05	1.47869	8.21818e-05	0.876341	0.00014464	0.0794225	0.00289218	0.00278934	7.27586e-05	0.282575	1.14291e-05	0.282569	-5.119	0.404254	1.07207	958.989
N11.8.1_d11	113.08	0.19	116	0.738056	5.14408e-05	1.4784	9.81759e-05	0.87624	0.000135992	0.0826361	0.000606635	0.0025808	3.59459e-05	0.282572	1.2345e-05	0.282566	-5.22048	0.43665	1.07764	964.558
N11.8.1_d12	113.08	0.19	116	0.738102	5.45203e-05	1.47848	0.000101416	0.87635	0.000141012	0.0950463	0.000763	0.00297111	4.79733e-05	0.282631	1.38261e-05	0.282625	-3.15023	0.489037	0.963903	850.823
N11.8.1_d13	113.08	0.19	116	0.738283	5.26996e-05	1.47883	0.00010598	0.876281	0.000204309	0.0538737	0.00157887	0.00181886	3.20513e-05	0.28256	1.19762e-05	0.282556	-5.57581	0.423608	1.09714	984.055
P14.03.1_w05	114	0.19	110	0.737957	2.38123e-05	1.47825	6.34865e-05	0.876791	0.000206428	0.0615344	0.00139089	0.00180762	4.05548e-05	0.282619	1.14576e-05	0.282615	-3.48409	0.405266	0.983019	869.019
P14.03.1_w08	114	0.19	90	0.738363	2.35688e-05	1.4791	6.07105e-05	0.876762	0.000275903	0.0389207	0.0010734	0.000900138	4.86774e-05	0.282534	1.22915e-05	0.282532	-6.40869	0.434767	1.14357	1029.57
P14.03.1_w09	114	0.19	85	0.738196	2.6642e-05	1.47873	7.43371e-05	0.876338	0.000202997	0.0658712	0.000531555	0.00193228	2.38112e-05	0.282618	1.30186e-05	0.282614	-3.51448	0.460483	0.984691	870.691
P14.03.1_w12	114	0.19	85	0.738222	2.81008e-05	1.47877	8.4115e-05	0.876437	0.000160719	0.0873108	0.00702297	0.00259349	0.000139247	0.282637	1.13593e-05	0.282632	-2.88546	0.401788	0.950098	836.098
P14.03.1_x09	114	0.19	60	0.738726	3.06122e-05	1.47982	0.000101419	0.875956	0.000151198	0.109102	0.00696956	0.00315177	0.000174244	0.282604	2.29537e-05	0.282597	-4.10068	0.811888	1.01691	902.907
P14.03.1_x13	114	0.19	80	0.738442	3.3329e-05	1.47921	8.51949e-05	0.876205	0.000202931	0.0753998	0.00453662	0.00194199	0.000125849	0.282624	1.28011e-05	0.28262	-3.29498	0.452786	0.972622	858.622
P14.03.1_y08	114	0.19	66	0.7385	3.40279e-05	1.47934	8.78769e-05	0.876365	0.000208624	0.0846633	0.00584286	0.00235774	0.000155091	0.282651	1.37041e-05	0.282646	-2.39651	0.484724	0.923194	809.194
P14.03.1_y11	114	0.19	17	0.738468	4.98977e-05	1.47924	0.00015582	0.876152	0.00031917	0.100908	0.0145213	0.00285229	0.000418833	0.282647	2.14317e-05	0.282641	-2.56494	0.758057	0.932463	818.463
P14.03.1_y14	114	0.19	55	0.73858	3.09851e-05	1.47948	9.25489e-05	0.876106	0.000205641	0.0877514	0.00201113	0.00242935	5.11154e-05	0.282631	1.51432e-05	0.282626	-3.09811	0.535629	0.961795	847.795
R.5979.1_j05	114.93	0.19	105	0.738568	3.81166e-05	1.47944	0.000136507	0.875682	0.000297806	0.051795	0.0019143	0.00119905	3.7564e-05	0.282613	1.47405e-05	0.28261	-3.62416	0.521389	0.991487	876.557
R.5979.1_j08	114.93	0.19	100	0.738611	3.20533e-05	1.47956	0.000111645	0.875727	0.000264065	0.0639827	0.00240553	0.0017078	5.09129e-05	0.282609	1.45109e-05	0.282605	-3.79849	0.513267	1.00107	886.139
R.5979.1_j09	114.93	0.19	100	0.738673	3.07591e-05	1.47972	0.000126738	0.875481	0.000280072	0.0754975	0.00586425	0.00245891	0.000137745	0.282611	1.48489e-05	0.282605	-3.79889	0.525218	1.00109	886.161
R.5979.1_k08	114.93	0.19	110	0.73892	2.24995e-05	1.48017	6.37762e-05	0.875973	0.00022862	0.0518075	0.00114697	0.00137767	3.23178e-05	0.282634	1.05352e-05	0.282632	-2.87628	0.372642	0.95036	835.43
R.5979.1_k09	114.93	0.19	105	0.738944	2.44791e-05	1.48018	6.00587e-05	0.875551	0.000271123	0.056434	0.00386951	0.00201789	0.000102964	0.282631	1.17196e-05	0.282627	-3.03203	0.414533	0.958928	843.998
R.5979.1_k12	114.93	0.19	105	0.738965	3.05662e-05	1.4802	7.3577e-05	0.875678	0.000291719	0.0390361	0.000275235	0.000995573	1.42018e-05	0.282603	1.14197e-05	0.2826	-3.97566	0.403928	1.01081	895.875
R.5979.1_l05	114.93	0.19	105	0.739094	2.78235e-05	1.48048	7.53872e-05	0.875577	0.000212962	0.0641369	0.002139	0.00149087	6.50303e-05	0.282631	1.32633e-05	0.282627	-3.02313	0.469138	0.958438	843.508
R.5979.1_l06	114.93	0.19	105	0.738753	4.78063e-05	1.47985	0.000117844	0.875606	0.000243249	0.0631302	0.00153412	0.00142437	4.25272e-05	0.282649	1.48253e-05	0.282646	-2.37059	0.524388	0.922534	807.604
R.5979.1_l07	114.93	0.19	115	0.738881	2.69277e-05	1.48009	7.01046e-05	0.87595	0.00023916	0.0573128	0.00124709	0.00149558	2.78553e-05	0.282629	1.15201e-05	0.282626	-3.06436	0.407478	0.960706	845.776
R.5979.1_l08	114.93	0.19	110	0.738837	3.05002e-05	1.48	7.11199e-05	0.875752	0.000184984	0.0674252	0.000742073	0.00170459	2.27356e-05	0.282614	1.23518e-05	0.282611	-3.60939	0.436897	0.990675	875.745
PRR-24226_01	115.66	0.21	100	0.740718	2.84419e-05	1.48375	5.63329e-05	0.873944	6.88236e-05	0.211196	0.0142961	0.00581454	0.000358847	0.282863	1.0495e-05	0.28285	4.87538	0.37121	0.522821	407.161
PRR-24226_03	115.66	0.21	65	0.740258	4.74555e-05	1.4828	9.0676e-05	0.874344	6.043e-05	0.427229	0.0157663	0.0106791	0.000264345	0.2829	1.47072e-05	0.282877	5.8278	0.520175	0.46998	354.32
PRR-24226_04	115.66	0.21	83	0.740487	3.18735e-05	1.48331	5.79986e-05	0.874153	7.02477e-05	0.215699	0.00512232	0.00669527	0.000141915	0.282864	1.10658e-05	0.28285	4.85178	0.391394	0.52413	408.47
PRR-24226_05	115.66	0.21	115	0.740201	3.75885e-05	1.48272	6.24749e-05	0.874288	5.45077e-05	0.341836	0.0118255	0.00989113	0.00015733	0.282832	9.49228e-06	0.282811	3.47764	0.335732	0.600274	484.614
PRR-24226_06	115.66	0.21	43	0.740526	3.30882e-05	1.48341	8.75785e-05	0.874096	9.72337e-05	0.293195	0.0259479	0.00773619	0.000404558	0.282863	1.46882e-05	0.282847	4.74495	0.519515	0.530053	414.393
PRR-24226_07	115.66	0.21	103	0.740511	3.5724e-05	1.48333	6.14151e-05	0.874053	7.60743e-05	0.178196	0.0109051	0.00523104	0.000324177	0.282857	1.00926e-05	0.282845	4.70587	0.356977	0.53222	416.56
PRR-24226_09	115.66	0.21	58	0.740407	5.48599e-05	1.48316	8.73351e-05	0.874206	9.51598e-05	0.195931	0.0157812	0.00603773	0.0004427	0.282864	1.57198e-05	0.28285	4.88471	0.556008	0.522303	406.643
PRR-24226_10	115.66	0.21	85	0.740465	2.40304e-05	1.48327	5.78641e-05	0.874269	8.40484e-05	0.202071	0.0227521	0.00742024	0.000509187	0.282882	1.22113e-05	0.282866	5.44655	0.431908	0.491138	375.478
PRR-5991_01	119.19	0.16	120	0.740259	2.64684e-05	1.48288	5.51016e-05	0.87461	9.73753e-05	0.15231	0.00897133	0.00706809	0.000265914	0.282785	9.79696e-06	0.28277	2.10456	0.346518	0.679164	559.974
PRR-5991_02	119.19	0.16	35	0.740459	9.62294e-05	1.4832	0.000473586	0.874358	0.000232228	0.113244	0.0135682	0.0036829	0.000275179	0.282773	2.64286e-05	0.282765	1.94304	0.934803	0.688094	568.904
PRR-5991_03	119.19	0.16	90	0.739831	2.83271e-05	1.48196	5.5949e-05	0.875034	8.00878e-05	0.143283	0.00431414	0.00501269	0.000176765	0.282739	9.32207e-06	0.282728	0.64041	0.329726	0.760063	640.873
PRR-5991_04	119.19	0.16	90	0.740091	2.60073e-05	1.48253	6.71036e-05	0.874785	0.000110702	0.128307	0.00413254	0.00560235	0.000125449	0.28277	1.25734e-05	0.282757	1.66228	0.444727	0.703614	584.424
PRR-5991_05	119.19	0.16	120	0.739511	2.22936e-05	1.48136	4.09996e-05	0.875482	0.000113706	0.0842482	0.00206914	0.00335698	9.27323e-05	0.282733	8.04201e-06	0.282726	0.555498	0.284454	0.764751	645.561
PRR-5991_06	119.19	0.16	100	0.739893	2.65627e-05	1.48211	5.75329e-05	0.874901	0.000122361	0.0940845	0.00183724	0.00375061	6.89006e-05	0.282766	1.0393e-05	0.282757	1.6697	0.367611	0.703204	584.014
PRR-5991_07	119.19	0.16	100	0.739471	2.8932e-05	1.48123	6.55741e-05	0.875368	9.23497e-05	0.161998	0.0197321	0.0060497	0.000556394	0.282758	1.12637e-05	0.282744	1.21272	0.3984	0.728455	609.265
PRR-5991_08	119.19	0.16	105	0.740004	2.63212e-05	1.48235	5.84134e-05	0.874827	0.00011399	0.114999	0.00557978	0.00544359	0.00017441	0.282746	1.12125e-05	0.282734	0.841257	0.396592	0.748973	629.783
PRR-5991_09	119.19	0.16	90	0.740343	2.02048e-05	1.483	5.19906e-05	0.874441	4.55291e-05	0.275513	0.0108479	0.00967046	0.000255024	0.282781	1.0097e-05	0.28276	1.75389	0.357123	0.698551	579.361
PRR-5991_10	119.19	0.16	105	0.740101	2.47736e-05	1.48251	6.83095e-05	0.874739	0.000108984	0.0986608	0.00161306	0.00385132	3.97039e-05	0.28276	1.04357e-05	0.282752	1.47051	0.369118	0.714212	595.022
N11.142.1_01	126.1	0.2	98	0.736814	5.40792e-05	1.47593	0.000102781	0.878016	0.00019584	0.0622795	0.00276571	0.0027196	8.6454e-05	0.282697	1.41334e-05	0.282691	-0.527563	0.499922	0.830209	704.109
N11.142.1_02	126.1	0.2	108	0.737319	4.45587e-05	1.47694	0.000102797	0.877321	0.000193887	0.065915	0.00188711	0.00245148	2.84275e-05	0.282691	1.12373e-05	0.282685	-0.738811	0.397484	0.841857	715.757
N11.142.1_03	126.1	0.2	104	0.737506	4.38197e-05	1.47736	9.19999e-05	0.877279	0.000282351	0.0437455	0.00224486	0.00173401	6.59509e-05	0.282745	1.45929e-05	0.282741	1.24683	0.516179	0.732269	606.169
N11.142.1_04	126.1	0.2	100	0.737695	4.8737e-05	1.47768	9.76332e-05	0.876641	0.000341104	0.0369257	0.000731864	0.0012563	1.53307e-05	0.282676	1.27888e-05	0.282673	-1.15066	0.452368	0.864559	738.459
N11.142.1_05	126.1	0.2	88	0.737049	4.65033e-05	1.47639	9.75999e-05	0.877636	0.000165385	0.0923907	0.00445732	0.00337062	0.00015338	0.282754	2.03526e-05	0.282746	1.40694	0.719901	0.723423	597.323
N11.142.1_07	126.1	0.2	66	0.738244	5.53844e-05	1.47879	0.000119703	0.87601	0.000159494	0.1182	0.00710935	0.00349368	0.000206246	0.282775	1.41985e-05	0.282766	2.14125	0.50222	0.682833	556.733
N11.142.1_09	126.1	0.2	110	0.738564	3.56629e-05	1.47943	8.89939e-05	0.875911	0.000128574	0.088308	0.0036274	0.00236155	0.000134541	0.282735	1.00619e-05	0.282729	0.829614	0.355908	0.755314	629.214
N11.142.1_10	126.1	0.2	110	0.738376	4.46776e-05	1.47904	8.4915e-05	0.876017	0.000209327	0.054718	0.00242641	0.00194175	4.78378e-05	0.282728	1.0949e-05	0.282723	0.613859	0.387288	0.767227	641.127
R.6317.1_h05	135.56	0.15	40	0.738026	5.96095e-05	1.47827	0.000107874	0.876465	0.000108586	0.254401	0.0107736	0.00680281	5.88864e-05	0.282622	2.40857e-05	0.282604	-3.37928	0.851937	0.995042	859.482
R.6317.1_i06	135.56	0.15	80	0.738427	2.83905e-05	1.47918	6.29838e-05	0.876103	0.000136238	0.107037	0.00446595	0.00276563	0.000131652	0.282575	1.23361e-05	0.282568	-4.67905	0.436358	1.06646	930.901
R.6317.1_i09	135.56	0.15	80	0.73786	2.9479e-05	1.47799	8.39135e-05	0.876943	9.14171e-05	0.189354	0.0039649	0.00456537	8.15365e-05	0.282603	1.42222e-05	0.282592	-3.82515	0.503063	1.01955	883.992
R.6317.1_i10	135.56	0.15	80	0.738489	2.80638e-05	1.47925	8.35875e-05	0.876093	9.94237e-05	0.156785	0.00364168	0.00372682	9.83406e-05	0.282574	1.36254e-05	0.282564	-4.79997	0.481957	1.0731	937.541
R.6317.1_i13	135.56	0.15	60	0.738352	3.3699e-05	1.47894	8.70464e-05	0.876178	0.000162214	0.196707	0.0201635	0.00538901	0.00037767	0.282623	1.78013e-05	0.282609	-3.21543	0.629659	0.986032	850.472
R.6317.1_k05	135.56	0.15	110	0.737021	4.20241e-05	1.47633	8.70712e-05	0.87769	0.000307602	0.092547	0.0097146	0.00387355	0.000215735	0.282642	1.54677e-05	0.282632	-2.39626	0.547124	0.940963	805.403
R.6057.3_r05	138.62	0.36	110	0.738594	3.11552e-05	1.47953	6.33994e-05	0.876269	0.000267074	0.0505663	0.00126034	0.00156435	2.67138e-05	0.282928	1.41241e-05	0.282924	7.98958	0.49961	0.368772	230.152
R.6057.3_r07	138.62	0.36	110	0.738227	2.8356e-05	1.4787	6.20126e-05	0.876485	0.000220839	0.0575617	0.000980077	0.0016418	1.42489e-05	0.28291	1.21131e-05	0.282906	7.36614	0.428475	0.403445	264.825
R.6057.3_r10	138.62	0.36	110	0.738423	3.20512e-05	1.47916	7.94413e-05	0.876138	0.000193823	0.0562291	0.00106243	0.0016067	1.21276e-05	0.28291	1.10423e-05	0.282906	7.34621	0.3906	0.404553	265.933
R.6057.3_s08	138.62	0.36	110	0.738089	2.54671e-05	1.47857	6.9154e-05	0.876585	0.000191651	0.064148	0.000620832	0.00174298	5.85832e-06	0.282902	1.0319e-05	0.282898	7.07064	0.365012	0.419872	281.252
R.6057.3_s11	138.62	0.36	110	0.738385	2.60473e-05	1.4791	7.39593e-05	0.876238	0.000195513	0.0549785	0.00120975	0.00164122	2.458e-05	0.282922	9.76931e-06	0.282917	7.75866	0.345569	0.381618	242.998
R.6057.3_s12	138.62	0.36	110	0.738448	3.01355e-05	1.47918	7.09785e-05	0.875797	0.000104365	0.162612	0.00461489	0.00448994	0.000100304	0.282896	1.38122e-05	0.282884	6.59604	0.488564	0.446245	307.625
R.6057.3_s14	138.62	0.36	110	0.738399	2.3467e-05	1.47911	5.94987e-05	0.875928	0.000133252	0.103185	0.000689078	0.0027	1.47627e-05	0.282885	1.12418e-05	0.282878	6.38508	0.39765	0.457963	319.343
R.6057.3_t06	138.62	0.36	85	0.738382	3.75029e-05	1.47906	0.000101025	0.876098	0.000198411	0.0675837	0.000892687	0.0016707	3.40726e-05	0.282916	1.35581e-05	0.282912	7.56498	0.47959	0.392389	253.769
R.6057.3_t11	138.62	0.36	110	0.738543	2.37529e-05	1.47939	5.70713e-05	0.875852	0.000223772	0.063447	0.000989274	0.00178025	2.17051e-05	0.282911	1.11921e-05	0.282906	7.36324	0.395895	0.403607	264.987
R.6057.3_u05	138.62	0.36	115	0.738476	3.21662e-05	1.47924	7.20844e-05	0.875943	0.000211968	0.0619858	0.00208806	0.00185414	4.51609e-05	0.282907	1.17602e-05	0.282902	7.22329	0.415991	0.411387	272.767
PRR-6037_j06	155.73	0.43	26	0.738735	4.59553e-05	1.47977	0.000237556	0.876231	0.000117483	0.176083	0.00139736	0.00471709	1.61452e-05	0.282718	2.3397e-05	0.282705	0.618726	0.827624	0.791391	635.661
PRR-6037_j07	155.73	0.43	85	0.737979	3.12817e-05	1.47826	7.11954e-05	0.877143	0.000114619	0.165409	0.00997101	0.00434037	0.000216097	0.282685	1.2667e-05	0.282673	-0.512041	0.448072	0.853787	698.057
PRR-6037_l05	155.73	0.43	110	0.738866	2.57746e-05	1.48007	6.45176e-05	0.876072	9.28576e-05	0.173508	0.00372786	0.00490494	9.11188e-05	0.282669	1.284e-05	0.282655	-1.133	0.454188	0.888021	732.291
PRR-6037_l06a	155.73	0.43	85	0.738183	2.78177e-05	1.4786	8.31647e-05	0.876929	7.84841e-05	0.267168	0.0110162	0.00706827	0.000188953	0.282724	1.34703e-05	0.282703	0.577702	0.476475	0.793656	637.926
PRR-6037_l06b	155.73	0.43	58	0.738527	2.81432e-05	1.47932	0.000108726	0.876692	0.000104927	0.194382	0.00198029	0.00574312	4.73821e-05	0.282696	1.36799e-05	0.282679	-0.276525	0.483896	0.840797	685.067
PRR-6037_l07a	155.73	0.43	66	0.739128	2.62336e-05	1.48053	8.01366e-05	0.875818	8.21765e-05	0.178199	0.00752204	0.00467381	0.00019635	0.282717	1.02304e-05	0.282703	0.560854	0.361881	0.794586	638.856
PRR-6037_l07b	155.73	0.43	50	0.7385	3.73211e-05	1.47928	0.000120325	0.876557	0.000103046	0.140475	0.00310825	0.00405695	6.09908e-05	0.282691	1.31117e-05	0.28268	-0.270105	0.463804	0.840443	684.713
R.5957.3_k06	156.05	0.27	110	0.738296	4.72953e-05	1.4789	7.3721e-05	0.876759	0.000125716	0.0992195	0.00258129	0.00409027	6.29277e-05	0.282898	1.17858e-05	0.282887	7.06051	0.416902	0.434801	278.751
R.5957.3_k10	156.05	0.27	70	0.73759	5.69479e-05	1.47747	9.77328e-05	0.877473	0.000289011	0.052288	0.00193916	0.00180414	6.52515e-05	0.282621	1.65804e-05	0.282616	-2.50906	0.586516	0.96407	808.02
R.5957.3_l05	156.05	0.27	70	0.737979	8.20623e-05	1.47827	0.0001139	0.877177	0.000152875	0.114332	0.00148066	0.00425238	1.40903e-05	0.282905	1.42498e-05	0.282893	7.27279	0.504061	0.423001	266.951
R.5957.3_l07	156.05	0.27	75	0.737727	6.26279e-05	1.47775	9.89786e-05	0.877261	0.000105682	0.197034	0.0117382	0.00652807	0.000354074	0.282902	1.41495e-05	0.282883	6.94971	0.500501	0.440959	284.909
R.5957.3_l08	156.05	0.27	110	0.737868	6.54396e-05	1.47803	8.60821e-05	0.876849	0.000142115	0.125016	0.00676609	0.00509222	0.00015174	0.282861	1.31874e-05	0.282846	5.63165	0.466479	0.514161	358.111
R.5957.3_l10a	156.05	0.27	110	0.738682	6.30862e-05	1.47971	7.72749e-05	0.876257	0.000197877	0.05152	0.000955009	0.00168898	4.29062e-05	0.282629	1.32513e-05	0.282624	-2.21549	0.468753	0.947911	791.861
R.5957.3_l10b	156.05	0.27	90	0.738708	4.31416e-05	1.47969	7.46392e-05	0.876146	0.000120316	0.0907864	0.0031357	0.0035209	6.15417e-05	0.282881	1.14156e-05	0.282871	6.50295	0.403811	0.465782	309.732
R.5957.3_l12	156.05	0.27	60	0.738883	3.65865e-05	1.48011	9.36877e-05	0.87604	0.000122942	0.0919549	0.0028877	0.003426	9.56326e-05	0.282878	1.46739e-05	0.282868	6.39466	0.519068	0.471797	315.747
R.5957.3_m06	156.05	0.27	80	0.738933	5.27568e-05	1.48019	8.75014e-05	0.875852	0.000153217	0.0960901	0.00116144	0.00391656	7.79649e-05	0.282919	1.6195e-05	0.282908	7.81941	0.572871	0.392603	236.553
R.5957.3_m12	156.05	0.27	96	0.738784	5.81363e-05	1.47991	9.3076e-05	0.876071	0.00011112	0.16255	0.0161479	0.00656148	0.000446954	0.282905	1.47164e-05	0.282886	7.04675	0.520554	0.435566	279.516
R.6307.1_j05	156.05	0.27	80	0.739083	2.86725e-05	1.48051	7.89403e-05	0.875631	0.000138242	0.0940461	0.00158322	0.00297001	4.08153e-05	0.282602	1.26978e-05	0.282593	-3.3092	0.449168	1.00809	852.038
R.6307.1_j07	156.05	0.27	100	0.73899	2.46842e-05	1.48029	6.50698e-05	0.875727	8.17092e-05	0.16519	0.00399911	0.00496767	0.000105449	0.282609	1.10423e-05	0.282594	-3.27531	0.3906	1.00622	850.174
R.6307.1_j09	156.05	0.27	55	0.738983	3.75102e-05	1.48031	0.000132046	0.875793	0.000149236	0.102799	0.00186605	0.00334589	5.8277e-05	0.282616	1.27014e-05	0.282606	-2.85822	0.449296	0.983283	827.233
R.6307.1_j11	156.05	0.27	60	0.73908	3.77091e-05	1.48044	0.000101267	0.875633	0.000153281	0.103878	0.00128904	0.00324458	5.12527e-05	0.282603	1.47134e-05	0.282594	-3.29071	0.520466	1.00707	851.022
R.6307.1_k09	156.05	0.27	90	0.738891	3.66281e-05	1.48009	7.41666e-05	0.875837	0.000139823	0.106992	0.00144096	0.00313564	8.83548e-05	0.282595	1.28239e-05	0.282586	-3.56471	0.45363	1.02214	866.087
PRR-32977_g13	159.65	0.27	72	0.740566	2.29873e-05	1.48344	7.58906e-05	0.874126	8.32738e-05	0.118514	0.00270763	0.00382542	0.000125231	0.282607	9.15292e-06	0.282596	-3.15302	0.323773	1.00247	842.818
PRR-32977_g14	159.65	0.27	116	0.740601	3.32333e-05	1.48353	6.208e-05	0.874036	5.85387e-05	0.145095	0.00346247	0.00426087	0.000117494	0.282599	9.38936e-06	0.282586	-3.49837	0.332135	1.02146	861.809
PRR-32977_h10	159.65	0.27	37	0.740476	5.03526e-05	1.48331	8.99609e-05	0.874281	9.6967e-05	0.266383	0.00659311	0.00776664	0.000135824	0.282609	1.41922e-05	0.282586	-3.48505	0.50201	1.02073	861.077
PRR-32977_h12	159.65	0.27	64	0.740685	3.9459e-05	1.48363	8.93776e-05	0.873852	0.00012232	0.0634531	0.00105905	0.00226777	2.78404e-05	0.282582	9.75709e-06	0.282575	-3.88127	0.34515	1.04251	882.856
PRR-32977_h13	159.65	0.27	40	0.740483	4.6663e-05	1.48332	0.000133919	0.874028	0.000197792	0.0671914	0.00211622	0.00228436	5.64495e-05	0.28259	1.41236e-05	0.282583	-3.60527	0.499613	1.02734	867.686
PRR-32977_h14	159.65	0.27	37	0.740482	3.6141e-05	1.48327	0.00019662	0.874334	0.000182137	0.069478	0.000781289	0.00227098	5.03333e-05	0.282603	1.60439e-05	0.282596	-3.12693	0.567541	1.00103	841.383
R.6851.1_d07	160.61	0.14	105	0.739098	2.56831e-05	1.48053	8.82556e-05	0.875564	0.000132124	0.0824197	0.00276247	0.00193956	7.84587e-05	0.282591	1.10545e-05	0.282585	-3.51545	0.391048	1.02319	862.58
R.6851.1_d13	160.61	0.14	115	0.739014	2.92392e-05	1.48029	6.43423e-05	0.875664	0.000110699	0.13158	0.00653149	0.00305859	0.000128268	0.282578	9.38633e-06	0.282569	-4.06832	0.332032	1.05358	892.967
R.6851.1_e08	160.61	0.14	60	0.739107	4.35285e-05	1.48056	0.000102954	0.87567	0.000198565	0.066093	0.00159053	0.0017706	0.000107341	0.282589	1.53257e-05	0.282584	-3.54764	0.542139	1.02496	864.349
R.6851.1_e11	160.61	0.14	30	0.739008	4.21835e-05	1.4804	0.000122892	0.875664	0.000165065	0.123309	0.00834947	0.00300127	0.000180959	0.282592	2.11927e-05	0.282583	-3.58816	0.749672	1.02719	866.577
R.6851.1_e14	160.61	0.14	55	0.739024	3.52387e-05	1.48035	8.00317e-05	0.875574	0.000141934	0.099633	0.00195007	0.00263605	2.60075e-05	0.282566	1.6318e-05	0.282558	-4.4589	0.577236	1.07503	914.424
R.6851.1_f06	160.61	0.14	20	0.738679	0.00010614	1.47973	0.000231683	0.875669	0.000210304	0.144252	0.0089162	0.00324091	1.59548e-05	0.282527	3.19012e-05	0.282517	-5.90809	1.12847	1.15457	993.963
R.6851.1_f07	160.61	0.14	45	0.738671	3.43848e-05	1.4796	9.48977e-05	0.87588	0.000186276	0.0853575	0.00228198	0.00224664	9.38605e-05	0.282588	1.70576e-05	0.282581	-3.64603	0.603402	1.03037	869.758
R.6607.1_h06	161.57	0.47	116	0.73814	4.97811e-05	1.47857	7.89137e-05	0.876402	0.000126204	0.119976	0.00525453	0.00351544	0.000112387	0.282599	1.17415e-05	0.282588	-3.37754	0.415342	1.0164	854.829
R.6607.1_h12	161.57	0.47	116	0.738409	4.03718e-05	1.47915	7.08427e-05	0.876327	0.000117035	0.0970509	0.00134504	0.00274844	1.35148e-05	0.28257	1.09023e-05	0.282562	-4.30529	0.385661	1.06739	905.818
R.6607.1_h14	161.57	0.47	106	0.738319	3.8879e-05	1.47898	7.96602e-05	0.876371	0.000112269	0.0982501	0.00175687	0.00278389	3.24523e-05	0.282582	1.20644e-05	0.282574	-3.89063	0.426769	1.0446	883.034
R.6607.1_i06	161.57	0.47	93	0.738318	4.53348e-05	1.47896	9.90401e-05	0.876403	8.97337e-05	0.157074	0.00792837	0.00403549	6.75476e-05	0.282579	1.44667e-05	0.282567	-4.1242	0.511741	1.05744	895.869
R.6607.1_i07	161.57	0.47	108	0.738317	4.18769e-05	1.47892	8.1018e-05	0.876354	0.000120288	0.115636	0.00574526	0.0033145	0.000138066	0.282582	1.12645e-05	0.282572	-3.93192	0.398472	1.04687	885.304
R.6607.1_j10	161.57	0.47	40	0.738318	8.56237e-05	1.47894	0.000161772	0.876374	0.00017031	0.145625	0.0200793	0.0034101	0.000271848	0.282569	2.15516e-05	0.282559	-4.41547	0.762365	1.07344	911.87
PRR-5983_m07	162.92	0.87	61	0.738647	4.22254e-05	1.47953	0.000122227	0.876246	9.54135e-05	0.13859	0.0144075	0.00322538	0.000177632	0.282574	1.40547e-05	0.282564	-4.20341	0.497172	1.0629	899.985
PRR-5983_m09	162.92	0.87	28	0.738853	8.04873e-05	1.47994	0.000214228	0.876112	0.000157427	0.13948	0.00305358	0.00414319	3.63921e-05	0.282574	2.09989e-05	0.282561	-4.30013	0.742812	1.06822	905.298
PRR-5983_m10	162.92	0.87	93	0.738724	4.12503e-05	1.47975	0.000101555	0.876206	9.53025e-05	0.14599	0.0112455	0.00415727	0.000154266	0.282579	1.25112e-05	0.282567	-4.09826	0.442568	1.05713	894.207
PRR-5983_m13	162.92	0.87	115	0.73867	4.17166e-05	1.4796	8.91079e-05	0.87611	9.86512e-05	0.0860078	0.00174392	0.00247584	2.56041e-05	0.282564	1.09821e-05	0.282557	-4.459	0.388486	1.07695	914.025
PRR-5983_m14	162.92	0.87	115	0.738839	4.40296e-05	1.48003	8.96502e-05	0.876284	0.000120209	0.122745	0.00198191	0.00478531	4.09887e-05	0.282573	1.26524e-05	0.282558	-4.39457	0.447562	1.07341	910.486
PRR-5983_o08	162.92	0.87	65	0.738523	3.24421e-05	1.47939	0.000109891	0.876237	0.000108647	0.149922	0.0069686	0.00418237	6.78572e-05	0.282568	1.35917e-05	0.282556	-4.49689	0.48079	1.07903	916.106
PRR-5983_o09	162.92	0.87	70	0.73864	5.1941e-05	1.47955	0.000110542	0.87626	0.00012829	0.122997	0.00737971	0.00377156	0.00011843	0.282581	1.24438e-05	0.282569	-4.00931	0.440186	1.05224	889.32
PRR-5983_o13	162.92	0.87	115	0.738659	3.62562e-05	1.47959	8.52094e-05	0.876072	0.000121704	0.0796544	0.00211285	0.00211386	8.26177e-05	0.282565	1.1202e-05	0.282558	-4.40143	0.396264	1.07378	910.863
R.6569.9_a08	163.53	0.53	75	0.738117	3.51308e-05	1.4785	8.66066e-05	0.876421	0.000133136	0.15337	0.00874743	0.00421992	0.0001575	0.282622	1.14502e-05	0.282609	-2.59857	0.405038	0.975165	811.635
R.6569.9_a12	163.53	0.53	36	0.737881	8.28122e-05	1.47793	0.000187184	0.876614	0.000136892	0.153312	0.00668577	0.00356364	7.76974e-05	0.282612	2.17678e-05	0.282601	-2.86126	0.770016	0.989619	826.089
R.6569.9_a14	163.53	0.53	73	0.737913	2.7669e-05	1.47808	8.61492e-05	0.876776	0.00013521	0.130292	0.00273493	0.00344758	3.59303e-05	0.282651	1.19702e-05	0.282641	-1.46825	0.423435	0.912927	749.397
R.6569.9_b07a	163.53	0.53	35	0.738019	3.67282e-05	1.47827	9.49217e-05	0.876597	0.000162287	0.180843	0.00767629	0.00427604	0.000170686	0.282558	2.11769e-05	0.282545	-4.85699	0.749106	1.0993	935.773
R.6569.9_b07b	163.53	0.53	65	0.737834	3.20276e-05	1.47791	7.57721e-05	0.876831	0.000113229	0.144285	0.00927272	0.00383367	0.00014999	0.282642	1.24603e-05	0.28263	-1.84841	0.440769	0.933868	770.338
R.6569.9_b12	163.53	0.53	106	0.73815	2.41374e-05	1.47854	6.61434e-05	0.876459	9.25649e-05	0.17312	0.00668666	0.00473661	0.000117645	0.282647	1.0852e-05	0.282633	-1.75798	0.383876	0.928887	765.357
R.6569.9_b14	163.53	0.53	106	0.738158	2.37685e-05	1.47855	6.22756e-05	0.876389	9.89392e-05	0.140118	0.00343487	0.00350934	7.13291e-05	0.282634	1.11037e-05	0.282624	-2.07053	0.392782	0.946099	782.569
R.6569.9_c10	163.53	0.53	55	0.738038	3.50465e-05	1.4783	8.46729e-05	0.876573	0.00012706	0.172613	0.00747804	0.00425688	9.56612e-05	0.282626	1.7201e-05	0.282613	-2.43755	0.608463	0.966304	802.774
R.6569.9_c11	163.53	0.53	100	0.737987	2.54237e-05	1.47824	7.78761e-05	0.876446	8.46298e-05	0.14881	0.00763165	0.00380626	0.000161094	0.282551	1.20414e-05	0.28254	-5.04682	0.425953	1.10972	946.195
R.6569.9_c14	163.53	0.53	83	0.737995	3.09457e-05	1.4782	8.31401e-05	0.876459	8.34183e-05	0.174652	0.0049776	0.00403835	0.000122941	0.282606	1.33487e-05	0.282593	-3.14541	0.472197	1.00525	841.72
R.6602.3_j05	164.47	0.39	40	0.738309	5.89292e-05	1.47891	0.000160029	0.876192	0.000145263	0.0925701	0.00275025	0.00254326	6.49892e-05	0.282617	2.01495e-05	0.282609	-2.57081	0.71278	0.974413	809.943
R.6602.3_j08	164.47	0.39	116	0.738088	3.99551e-05	1.47847	9.12336e-05	0.876581	9.83099e-05	0.168209	0.00710957	0.00422253	0.000114036	0.282636	1.14468e-05	0.282623	-2.0874	0.404917	0.947803	783.333
R.6602.3_k05	164.47	0.39	53	0.737647	6.62668e-05	1.4776	0.000155358	0.877047	0.000138485	0.0968965	0.00174148	0.00310004	7.4483e-05	0.282598	1.59749e-05	0.282589	-3.28205	0.565102	1.01354	849.07
R.6602.3_k06	164.47	0.39	53	0.737428	4.12804e-05	1.4771	0.000134982	0.877411	0.000126618	0.159758	0.00605546	0.00359333	1.40647e-05	0.282602	1.87749e-05	0.28259	-3.22674	0.664145	1.0105	846.028
R.6602.3_k09	164.47	0.39	116	0.738211	5.14968e-05	1.47866	0.000117649	0.87641	0.000128902	0.105956	0.00274968	0.00305764	9.31214e-05	0.28261	1.29023e-05	0.282601	-2.86854	0.456408	0.990795	826.325
R.6602.3_k10	164.47	0.39	93	0.737898	4.73937e-05	1.478	0.000104551	0.876816	8.73186e-05	0.222591	0.00732397	0.0049075	0.000224911	0.282625	1.29143e-05	0.28261	-2.52598	0.456824	0.971946	807.476
R.6602.3_k11	164.47	0.39	23	0.737724	6.60885e-05	1.47784	0.000299799	0.876938	0.000152793	0.118184	0.00179397	0.00311229	7.63617e-05	0.282603	3.00867e-05	0.282593	-3.12627	1.0643	1.00497	840.502
R.6602.3_k14	164.47	0.39	33	0.738431	8.31832e-05	1.47921	0.000219884	0.876339	0.000205577	0.126813	0.00245569	0.00426381	0.000232524	0.282609	1.84755e-05	0.282596	-3.03225	0.65355	0.999801	835.331
R.6307.1_j10	177.2	1.5	65	0.739032	3.97155e-05	1.4804	0.000109383	0.875826	0.000126989	0.152242	0.00491032	0.00463607	9.82545e-05	0.282598	1.69372e-05	0.282582	-3.23401	0.599145	1.0214	844.196
R.5257.5_q11	183.06	0.27	100	0.737123	2.74527e-05	1.47659	8.92883e-05	0.878172	0.000139805	0.0853603	0.00168208	0.00255255	3.05445e-05	0.282693	1.13066e-05	0.282684	0.505133	0.399981	0.820196	637.136
R.5257.5_q9	183.06	0.27	100	0.736355	2.70378e-05	1.4749	7.35024e-05	0.878703	0.000108654	0.17255	0.00509172	0.0054037	0.000122278	0.282639	1.29314e-05	0.28262	-1.75324	0.457444	0.94473	761.67
R.5257.5_r11	183.06	0.27	110	0.737071	3.22388e-05	1.47643	6.01599e-05	0.877528	0.000269146	0.0560516	0.000527845	0.00174282	3.25112e-05	0.28259	1.32523e-05	0.282585	-3.02245	0.468817	1.01459	831.533
R.5257.5_r12	183.06	0.27	95	0.736826	4.21912e-05	1.47586	9.1159e-05	0.878148	7.39304e-05	0.192995	0.00851134	0.00577131	9.36918e-05	0.282691	1.21961e-05	0.282671	0.040883	0.431429	0.84582	662.76
R.5257.5_q12	195.5	1.5	100	0.736152	3.41262e-05	1.47459	0.000106592	0.879162	0.000103148	0.143394	0.0019315	0.00385228	0.000124922	0.28263	1.31319e-05	0.282616	-1.64868	0.464557	0.949228	753.728
R.5257.5_r10	197.7	3.8	115	0.737379	2.9618e-05	1.47697	7.01967e-05	0.877254	0.000343799	0.0451303	0.00227897	0.00148768	5.421e-05	0.282589	1.18641e-05	0.282583	-2.74713	0.419722	1.01152	813.817
R.5786.3_g06	203.37	0.67	100	0.739067	2.43536e-05	1.48044	8.20433e-05	0.875631	0.000151227	0.0948766	0.00660977	0.00180356	0.000169678	0.282565	1.23621e-05	0.282558	-3.50568	0.437342	1.05792	854.545
R.5786.3_g07	203.37	0.67	22	0.738637	5.75902e-05	1.4795	0.000233499	0.875882	0.000235469	0.0894182	0.00188611	0.00230388	0.000107758	0.282573	2.36964e-05	0.282564	-3.3027	0.838317	1.04675	843.384
R.5786.3_g09	203.37	0.67	105	0.738921	2.62349e-05	1.48012	5.89489e-05	0.875559	0.000147875	0.0873214	0.00241813	0.00218297	5.71212e-05	0.282521	1.11764e-05	0.282513	-5.10065	0.395395	1.14554	942.168
R.5786.3_g12	203.37	0.67	105	0.739207	2.18065e-05	1.48068	6.17682e-05	0.875562	0.000112049	0.103032	0.00290819	0.00246734	7.97185e-05	0.282564	1.10167e-05	0.282555	-3.61335	0.389742	1.06383	860.465
R.5786.3_g14	203.37	0.67	60	0.738673	4.6931e-05	1.47962	0.000124359	0.875955	0.000236244	0.0672978	0.0025854	0.00158769	8.61694e-05	0.282564	1.3946e-05	0.282558	-3.52093	0.493379	1.05875	855.384
R.5786.3_h11	203.37	0.67	110	0.738902	3.62733e-05	1.48011	8.92099e-05	0.875576	0.000191857	0.0753903	0.00593022	0.00237597	0.000112723	0.282511	1.18025e-05	0.282502	-5.50602	0.417543	1.16778	964.415
R.5786.3_i07	203.37	0.67	60	0.738913	2.8139e-05	1.48013	8.34307e-05	0.875734	0.000154623	0.098688	0.0046088	0.00214888	0.000116768	0.282573	1.24967e-05	0.282565	-3.25022	0.442102	1.04387	840.498
R.5786.3_i10	203.37	0.67	100	0.738865	2.41739e-05	1.48005	5.91958e-05	0.875593	0.000123987	0.152283	0.0028096	0.00386596	4.56645e-05	0.282569	1.28714e-05	0.282554	-3.64567	0.455348	1.06561	862.242
R.5786.3_i11	203.37	0.67	100	0.73889	2.47968e-05	1.48011	5.41823e-05	0.875549	0.000174338	0.0845733	0.00300753	0.00177525	8.48572e-05	0.282574	1.2559e-05	0.282568	-3.16746	0.444307	1.03932	835.946
R.5786.3_i13	203.37	0.67	50	0.738228	3.50665e-05	1.47869	0.000111043	0.8766	0.00021616	0.0785054	0.00369073	0.00196865	9.44743e-05	0.282545	1.42656e-05	0.282538	-4.23012	0.504684	1.09773	894.362
R.6307.1_m14	206.2	1.9	52	0.738812	3.04466e-05	1.47997	9.12544e-05	0.875887	0.000161126	0.124791	0.00345681	0.00360548	6.98639e-05	0.28258	1.69995e-05	0.282566	-3.15762	0.601393	1.04111	834.909
R.6067.8_e07	207.6	2.5	95	0.735204	2.74182e-05	1.47264	7.62067e-05	0.880401	0.00018694	0.0661608	0.00105085	0.0015326	3.97463e-05	0.282544	1.24743e-05	0.282538	-4.13613	0.441317	1.09606	888.455
R.6067.8_e09	207.6	2.5	95	0.734967	3.27445e-05	1.47219	9.59972e-05	0.88045	0.000136156	0.11879	0.00383717	0.00276964	8.54439e-05	0.2826	1.37405e-05	0.28259	-2.29308	0.486103	0.994691	787.091
R.6067.8_e11	207.6	2.5	90	0.7351	3.20575e-05	1.47248	7.82289e-05	0.880589	0.000196753	0.0944892	0.00255521	0.00268458	7.09246e-05	0.282459	1.73708e-05	0.282448	-7.29486	0.614537	1.26934	1061.74
R.6067.8_e14	207.6	2.5	110	0.734957	3.19579e-05	1.47218	7.04945e-05	0.880511	0.000106735	0.126417	0.00265235	0.00316349	5.96443e-05	0.282515	1.18616e-05	0.282502	-5.38135	0.41963	1.16443	956.832
R.6067.8_f08	207.6	2.5	100	0.73512	2.95319e-05	1.47252	9.0971e-05	0.880657	0.000316864	0.0445043	0.00109548	0.000932542	3.54401e-05	0.282466	1.31655e-05	0.282462	-6.7966	0.465773	1.24204	1034.44
R.5257.5_r7	208.2	1.7	90	0.736145	3.46641e-05	1.47454	0.000101082	0.878933	0.000175811	0.0621964	0.00212833	0.00136886	9.1383e-05	0.28254	1.2005e-05	0.282534	-4.24441	0.424716	1.1025	894.299
R.5257.5_r8	208.5	2.1	120	0.736797	4.18958e-05	1.47583	7.58081e-05	0.878052	0.000101081	0.154398	0.00309281	0.00436492	4.80869e-05	0.282654	1.21924e-05	0.282637	-0.589391	0.431329	0.901562	693.062
R.6306.7_d07	212.4	2.5	10	0.739071	0.000108716	1.48045	0.000514125	0.8755	0.000311181	0.138829	0.00435746	0.00390565	0.00014821	0.282463	3.98924e-05	0.282448	-7.21434	1.41129	1.26888	1056.48
R.6306.7_d14	212.4	2.5	55	0.739122	2.96299e-05	1.48049	0.000113604	0.875258	0.000188114	0.0704047	0.00501795	0.00153196	0.000149631	0.282421	1.39776e-05	0.282415	-8.37617	0.494506	1.33248	1120.08
R.6306.7_e07	212.4	2.5	25	0.739118	7.43368e-05	1.48074	0.000285217	0.875707	0.000136376	0.160582	0.0159725	0.00492896	0.00056084	0.282461	2.52186e-05	0.282441	-7.44853	0.892153	1.28171	1069.31
R.6306.7_e08	212.4	2.5	50	0.739222	5.80871e-05	1.48072	0.000107116	0.875416	0.00018066	0.105195	0.0083275	0.00258372	0.00024149	0.282445	1.67085e-05	0.282435	-7.66406	0.591113	1.29351	1081.11
R.6306.7_e10	212.4	2.5	23	0.739001	5.71185e-05	1.48018	0.000220325	0.875386	0.000182359	0.124814	0.00717907	0.0028306	0.000162219	0.282403	2.3217e-05	0.282391	-9.20614	0.821367	1.37787	1165.47
R.6306.7_e13	212.4	2.5	10	0.738942	0.000106795	1.4803	0.000623553	0.875711	0.000232431	0.0927995	0.00435615	0.00238943	0.000234046	0.282427	3.61316e-05	0.282417	-8.27902	1.27827	1.32717	1114.77
R.6306.7_e14	212.4	2.5	120	0.73903	2.61662e-05	1.48033	6.48397e-05	0.875309	9.57113e-05	0.125548	0.00355764	0.00285433	5.50463e-05	0.282453	1.12556e-05	0.282442	-7.40695	0.398198	1.27943	1067.03
R.6306.7_f05	212.4	2.5	100	0.739024	2.87385e-05	1.4803	8.31457e-05	0.875426	0.000139818	0.0882524	0.00407618	0.00211241	6.18437e-05	0.28244	1.20274e-05	0.282432	-7.77268	0.425507	1.29946	1087.06
R.6306.7_f07	212.4	2.5	100	0.739138	2.46287e-05	1.48057	6.79732e-05	0.87519	0.000219363	0.0595034	0.00278045	0.00141239	7.77725e-05	0.282428	1.05136e-05	0.282422	-8.12141	0.371956	1.31854	1106.14
R.6306.7_f08	212.4	2.5	95	0.739016	3.40021e-05	1.48035	9.70355e-05	0.875368	0.000207845	0.0618125	0.00142904	0.00135079	7.11274e-05	0.282442	1.36381e-05	0.282436	-7.6129	0.482498	1.29071	1078.31
R.6306.7_f12	212.4	2.5	80	0.739099	2.55406e-05	1.48048	7.33075e-05	0.875603	0.00019023	0.0760374	0.00891793	0.00137544	0.000238947	0.282495	1.14137e-05	0.28249	-5.72454	0.403799	1.18722	974.821
R.6306.7_f13	212.4	2.5	90	0.739015	2.1034e-05	1.48021	7.02719e-05	0.875468	0.000153881	0.0796505	0.00661062	0.00157664	0.000181894	0.282469	1.0289e-05	0.282462	-6.68958	0.36401	1.24013	1027.73
R.6306.7_f14	212.4	2.5	70	0.738932	4.07768e-05	1.48013	0.000110798	0.87561	0.000125135	0.10693	0.00495934	0.00276463	0.000109214	0.282499	1.50031e-05	0.282488	-5.78253	0.530778	1.1904	978.002
K7.526.3_a11	215.2	1.8	40	0.738955	5.72736e-05	1.48019	0.000161437	0.875691	0.000179303	0.0857134	0.00406867	0.00238734	5.85558e-05	0.282556	2.262e-05	0.282547	-3.64665	0.800258	1.07542	860.22
K7.526.3_b13	215.2	1.8	110	0.739017	3.3344e-05	1.4803	6.16817e-05	0.875543	0.000128741	0.0803912	0.00269903	0.00218621	5.51109e-05	0.282517	1.12154e-05	0.282509	-4.99243	0.396782	1.14935	934.152
K7.526.3_c08	215.2	1.8	75	0.739113	3.27369e-05	1.48053	7.06434e-05	0.87556	0.00020236	0.0704441	0.00227517	0.00197289	6.10588e-05	0.282533	1.39478e-05	0.282525	-4.42153	0.493452	1.118	902.802
K7.526.3_c09	215.2	1.8	89	0.738991	2.9906e-05	1.48031	8.09035e-05	0.875256	0.000644342	0.0518541	0.0080924	0.00191085	0.000241443	0.28247	1.15116e-05	0.282462	-6.63801	0.407263	1.23962	1024.42
R.5290.1_n11	216.2	2	110	0.738611	2.35196e-05	1.47954	5.7786e-05	0.876157	0.000171785	0.0571832	0.00246141	0.00267858	9.06147e-05	0.282591	8.50316e-06	0.282581	-2.42556	0.300826	1.00907	792.874
R.5290.1_o07	216.2	2	113	0.738745	2.58103e-05	1.47975	7.92545e-05	0.876043	0.000150891	0.056523	0.00138017	0.00249782	0.000106761	0.282592	9.11192e-06	0.282582	-2.35995	0.322364	1.00546	789.263
R.5290.1_q14	216.2	2	90	0.738497	2.87152e-05	1.47926	5.78896e-05	0.876415	0.000165526	0.0605602	0.000734245	0.00248623	3.58421e-05	0.282637	1.2169e-05	0.282627	-0.780197	0.430519	0.918431	702.231
K7.562_u05	217.35	0.58	85	0.737202	3.42008e-05	1.47669	7.68701e-05	0.877633	0.000108208	0.102887	0.0025638	0.00300494	4.40671e-05	0.282508	1.20166e-05	0.282496	-5.38562	0.425123	1.17271	955.357
K7.562_u06	217.35	0.58	80	0.738189	4.32845e-05	1.47865	9.62984e-05	0.876373	8.75797e-05	0.136215	0.00488701	0.00356769	0.000128684	0.282518	1.20783e-05	0.282504	-5.12089	0.427305	1.15818	940.828
K7.562_u07	217.35	0.58	50	0.737073	5.62608e-05	1.47638	0.000141994	0.877797	0.000153101	0.111817	0.00628914	0.00324593	0.00013699	0.282546	1.77213e-05	0.282533	-4.09602	0.626945	1.10189	884.541
K7.562_u08	217.35	0.58	55	0.737788	3.19971e-05	1.47789	9.62855e-05	0.877117	0.000123217	0.138933	0.00345397	0.0035955	0.000105069	0.282524	1.61407e-05	0.28251	-4.90517	0.571023	1.14634	928.985
K7.562_u10	217.35	0.58	87	0.737043	3.72119e-05	1.47636	8.52189e-05	0.877974	0.000115031	0.128647	0.00755604	0.00368087	0.000103443	0.282553	1.28292e-05	0.282538	-3.88847	0.453868	1.09049	873.135
K7.562_u12	217.35	0.58	117	0.73697	3.27819e-05	1.47625	6.56777e-05	0.878009	9.31392e-05	0.159375	0.0119005	0.00433334	0.000183287	0.282519	1.03762e-05	0.282501	-5.21354	0.367084	1.16326	945.913
K7.562_u14	217.35	0.58	105	0.736705	3.47956e-05	1.47567	7.38395e-05	0.878313	0.000114531	0.109163	0.00267014	0.00329225	2.20697e-05	0.282528	1.24787e-05	0.282514	-4.73852	0.441472	1.13718	919.834
K7.562_w07	217.35	0.58	57	0.736839	4.4389e-05	1.47593	9.70148e-05	0.878217	0.000214671	0.089757	0.00267441	0.00263703	7.63489e-05	0.282513	1.77479e-05	0.282503	-5.1576	0.627892	1.16019	942.843
K7.562_x11	217.35	0.58	77	0.737599	4.63051e-05	1.47741	8.56083e-05	0.877201	0.000152306	0.105762	0.00667141	0.00267378	0.000117601	0.282537	1.23692e-05	0.282526	-4.31429	0.4376	1.11388	896.533
K7.562_x12	217.35	0.58	71	0.736463	4.33696e-05	1.47514	9.17169e-05	0.878706	0.000197254	0.0826434	0.00493544	0.00250183	0.000154823	0.282518	1.42213e-05	0.282508	-4.96571	0.503126	1.14966	932.309
K7.562_x13	217.35	0.58	100	0.736917	3.55653e-05	1.47612	9.77944e-05	0.878365	0.00016074	0.107139	0.0046992	0.00283101	0.000124005	0.282544	1.27976e-05	0.282532	-4.11068	0.452756	1.1027	885.347
K7.562_x14	217.35	0.58	100	0.736911	3.47583e-05	1.47604	7.50836e-05	0.877985	0.000125687	0.0782199	0.00107251	0.00221568	7.01445e-05	0.282516	1.06993e-05	0.282507	-4.99253	0.378524	1.15113	933.781
R.5257.5_q5	220.6	1.4	113	0.736939	3.00902e-05	1.4762	7.87937e-05	0.878072	0.000178952	0.0839536	0.00652859	0.00303293	0.00023138	0.282619	1.28843e-05	0.282606	-1.41814	0.455825	0.957221	736.621
K7.557.1_g08	223.5	1.8	43	0.735049	0.000108219	1.47226	0.00019775	0.880312	0.000241139	0.122144	0.00601234	0.0032752	0.00010791	0.282481	1.5134e-05	0.282467	-6.26673	0.535415	1.22611	1002.61
K7.557.1_g09	223.5	1.8	16	0.734909	0.00015623	1.47212	0.00038294	0.880769	0.000286106	0.24305	0.00739779	0.00625087	0.000204236	0.282578	4.05936e-05	0.282552	-3.28539	1.43607	1.0624	838.9
K7.557.1_g10	223.5	1.8	50	0.737773	3.95292e-05	1.47776	0.000116782	0.876721	0.000143482	0.121509	0.00453281	0.00332199	0.000210488	0.282477	1.56252e-05	0.282463	-6.43286	0.552796	1.23522	1011.72
K7.557.1_g13	223.5	1.8	25	0.735209	5.94934e-05	1.47271	0.000201973	0.880787	0.00035049	0.101285	0.0036943	0.00277265	0.000115426	0.282525	3.25774e-05	0.282513	-4.64121	1.15255	1.13691	913.412
K7.557.1_g13	223.5	1.8	30	0.737766	6.17139e-05	1.47764	0.000222761	0.876803	0.000185661	0.122195	0.0054108	0.00289222	0.000129198	0.282507	2.32743e-05	0.282494	-5.3077	0.823413	1.1735	950.002
K7.557.1_g14	223.5	1.8	30	0.738139	6.00299e-05	1.47846	0.000149566	0.87649	9.35676e-05	0.219832	0.00549788	0.0048706	8.97923e-05	0.282552	1.17695e-05	0.282531	-4.00787	0.416375	1.10212	878.618
K7.557.1_h05	223.5	1.8	67	0.735261	4.06519e-05	1.47283	0.00011111	0.880402	0.000261966	0.0756648	0.00412778	0.0018508	0.000103392	0.282481	2.08768e-05	0.282473	-6.07082	0.738602	1.21537	991.867
K7.557.1_i10	223.5	1.8	55	0.735236	5.27422e-05	1.47276	0.00012507	0.880251	0.000271351	0.106886	0.00249368	0.00284671	6.03395e-05	0.282486	1.96642e-05	0.282474	-6.02371	0.695691	1.21278	989.284
K7.557.1_i11	223.5	1.8	58	0.735293	5.54606e-05	1.47282	0.000134211	0.880223	0.00023424	0.130311	0.00185176	0.00343917	3.46478e-05	0.282521	2.47526e-05	0.282507	-4.86318	0.875705	1.1491	925.601
R.5290.1_n08	237.3	2.2	105	0.738608	3.65482e-05	1.47954	7.1484e-05	0.876118	0.000176699	0.0609989	0.00138878	0.00276418	5.10499e-05	0.282608	9.88173e-06	0.282596	-1.40868	0.349613	0.970466	733.166
R.5290.1_n07	243.2	1.7	110	0.738667	3.2251e-05	1.47965	7.05455e-05	0.876074	0.000154142	0.0819759	0.00477409	0.00273605	0.000141582	0.282532	4.38397e-05	0.282519	-3.99159	1.55106	1.11747	874.266
R.5290.1_q13	244.6	2.5	90	0.738587	3.09042e-05	1.47948	7.38291e-05	0.876184	0.000148814	0.134148	0.00606023	0.00462139	0.000125092	0.28266	1.66456e-05	0.282638	0.253804	0.588906	0.884799	640.199
K7.557.1_i06	247.8	5.7	26	0.73745	5.79373e-05	1.47716	0.000167708	0.877077	0.000177798	0.16201	0.00673052	0.00356008	7.73664e-05	0.282505	1.60755e-05	0.282489	-4.97301	0.568753	1.17517	927.368
R.5290.1_o06	252.5	2	113	0.73873	2.9603e-05	1.47975	6.94722e-05	0.876152	0.000104079	0.111715	0.00471393	0.00319472	0.00012514	0.282457	2.87731e-05	0.282442	-6.51316	1.01801	1.26353	1011.03
R.6569.9_b05	254.8	5.6	98	0.738031	2.7891e-05	1.4783	7.99612e-05	0.876456	8.20377e-05	0.199269	0.00276571	0.00477535	8.27399e-05	0.282641	1.30389e-05	0.282618	-0.23545	0.461313	0.920204	665.404
R.6569.9_b05a	254.8	5.6	13	0.734886	0.000201867	1.47229	0.000611331	0.879405	0.00123299	0.0525473	0.00413013	0.00167304	0.00010471	0.282481	6.94927e-05	0.282473	-5.35779	2.45876	1.20206	947.26
R.6569.9_b05b	254.8	5.6	33	0.73515	0.000101244	1.47265	0.000175999	0.880623	0.000574533	0.0412444	0.000642402	0.00109003	1.54704e-05	0.282558	2.18166e-05	0.282552	-2.5608	0.771914	1.04834	793.54
R.5290.1_o09	260.4	2.5	115	0.738494	3.28457e-05	1.47921	7.56999e-05	0.876401	0.000139317	0.0758502	0.00329778	0.0027368	8.36166e-05	0.282458	1.68895e-05	0.282445	-6.24039	0.597575	1.25509	994.692
PRR-32977_g09	264.3	11.7	22	0.740515	3.69058e-05	1.48349	0.000201649	0.87426	0.000118845	0.28041	0.0112169	0.0072778	0.000189356	0.282617	1.60421e-05	0.282581	-1.32931	0.567551	0.988349	724.049
R.5290.1_q09	265.1	2.3	100	0.73849	2.10246e-05	1.47927	7.48411e-05	0.876564	0.000190519	0.0548688	0.00215289	0.00248375	7.99106e-05	0.282617	9.08791e-06	0.282604	-0.491986	0.321547	0.942845	677.745
PRR-32977_g08	268.9	10.4	20	0.740453	4.07154e-05	1.48336	0.000202208	0.874236	0.000150257	0.259158	0.0172947	0.0069253	0.00034155	0.282619	1.97479e-05	0.282584	-1.11704	0.698668	0.980441	711.541
R.6306.7_d11	270.6	2.6	45	0.739062	4.25605e-05	1.48041	0.000136193	0.875427	0.000264357	0.0804692	0.00295741	0.00195844	0.000116582	0.282494	1.94415e-05	0.282484	-4.62006	0.68789	1.17458	903.983
R.6851.1_g09	271.4	3.1	37	0.738675	4.20311e-05	1.47963	0.00011036	0.875783	0.000201472	0.101485	0.0132808	0.00254129	0.00033296	0.282549	2.13146e-05	0.282537	-2.75027	0.75416	1.07245	801.05
R.6067.8_f05	294.1	5.3	58	0.735148	3.79249e-05	1.4726	0.000117625	0.880563	0.000169812	0.0994888	0.00400652	0.00299686	0.000137891	0.282652	1.68002e-05	0.282635	1.25215	0.594451	0.870456	576.356
R.6569.9_c08	305.8	11.2	48	0.737907	6.20857e-05	1.47803	0.000149615	0.876772	0.000145151	0.150269	0.0173455	0.00333212	0.000219359	0.282677	1.8097e-05	0.282658	2.30909	0.640348	0.82166	515.86
R.6569.9_c08a	305.8	11.2	100	0.735228	4.19282e-05	1.47275	0.000110818	0.880316	0.000235667	0.100453	0.00491363	0.00236343	0.000129616	0.282603	1.56882e-05	0.28259	-0.0993966	0.555125	0.954727	648.927
R.6569.9_c08b	305.8	11.2	90	0.735297	4.42945e-05	1.47289	0.000102114	0.880368	0.000139535	0.15386	0.0038184	0.004194	5.52763e-05	0.282602	1.96277e-05	0.282578	-0.529613	0.694501	0.978461	672.661
R.6067.8_d08	312	8.6	105	0.735054	3.81686e-05	1.47241	8.89423e-05	0.880674	0.000159337	0.0904731	0.00109431	0.00246711	3.27826e-05	0.282604	1.31062e-05	0.28259	0.0336384	0.463767	0.952494	640.494
R.5290.1_o08	312	7	108	0.738608	4.06217e-05	1.47949	8.74895e-05	0.876192	0.000159497	0.0967113	0.00769327	0.00394138	0.000155847	0.282601	1.08162e-05	0.282578	-0.38093	0.382724	0.975368	663.368
R.6067.8_e12	318.1	7.7	47	0.734953	5.89207e-05	1.47211	0.000126352	0.880833	0.000294918	0.0795217	0.00708385	0.00209046	0.000146761	0.282629	1.82309e-05	0.282617	1.12634	0.645118	0.897181	579.081
R.6067.8_f14	324.6	19.3	100	0.735084	2.9477e-05	1.47246	8.74679e-05	0.880335	0.000167451	0.185996	0.0173574	0.00540192	0.000365373	0.282596	1.542e-05	0.282563	-0.631299	0.545621	0.99956	674.96
R.5290.1_n09	343.1	4.5	105	0.738727	2.86936e-05	1.47976	7.46562e-05	0.876151	0.00011692	0.107181	0.00490948	0.00289401	0.000165021	0.282503	1.2123e-05	0.282484	-2.99622	0.428999	1.14508	801.975
R.6067.8_f11	346.1	8.5	100	0.735105	3.51256e-05	1.47241	7.74533e-05	0.880245	0.000218677	0.0854927	0.00472785	0.0024581	0.000130966	0.282598	1.35397e-05	0.282582	0.529029	0.479141	0.953241	607.141
R.5290.1_q10	351.8	3.9	110	0.738465	2.69863e-05	1.4792	6.43739e-05	0.876405	0.000189393	0.0617054	0.00344046	0.00232786	8.57925e-05	0.282504	1.15894e-05	0.282489	-2.65056	0.410129	1.13322	781.423
R.5257.5_s8	365.2	3	50	0.736549	3.72124e-05	1.47531	0.00011447	0.87852	0.000155115	0.112924	0.0106905	0.00308381	0.000225732	0.282653	1.73696e-05	0.282631	2.70151	0.614686	0.848876	483.676
R.6851.1_e13	381.2	4.3	45	0.739127	5.01581e-05	1.48051	0.000112497	0.875486	0.000253312	0.0983916	0.00583964	0.00265981	9.36591e-05	0.282548	1.82072e-05	0.282529	-0.561874	0.644358	1.04236	661.161
R.6067.8_d13	388.8	14.3	105	0.734983	3.67704e-05	1.47223	8.55843e-05	0.880496	0.000164003	0.102937	0.00176085	0.00269541	3.23046e-05	0.282578	1.39252e-05	0.282558	0.646155	0.492823	0.981946	593.146
R.5290.1_q08	402.5	4.2	105	0.738426	2.96835e-05	1.47915	7.50323e-05	0.876696	0.00016173	0.0848867	0.00391432	0.00278016	9.34867e-05	0.28253	1.10817e-05	0.282509	-0.804262	0.3922	1.07327	670.774
R.5257.5_s11	408.3	3.2	116	0.737626	3.01022e-05	1.47752	7.34783e-05	0.877127	6.0562e-05	0.303993	0.0216444	0.00771943	0.000207058	0.282708	1.12109e-05	0.282649	4.27748	0.396724	0.797075	388.775
R.5257.5_q7	418.6	3.7	100	0.737268	3.31946e-05	1.4768	6.60446e-05	0.877597	9.31998e-05	0.191838	0.00878981	0.00540127	0.000169791	0.282571	1.22763e-05	0.282529	0.257316	0.434462	1.02796	609.359
R.6067.8_d10a	423.5	14.8	55	0.735088	5.81803e-05	1.47247	0.0001274	0.880397	0.000144629	0.158635	0.0108151	0.00385251	0.00019583	0.282606	1.59586e-05	0.282576	2.0272	0.564808	0.934194	510.694
R.6067.8_d10b	423.5	14.8	55	0.735181	4.08195e-05	1.47267	8.96656e-05	0.880188	0.000456095	0.0454255	0.00178224	0.00119525	5.48005e-05	0.28259	2.28224e-05	0.282581	2.21704	0.807793	0.923694	500.194
R.6067.8_d06	428	10.9	80	0.735208	2.7597e-05	1.47268	6.85198e-05	0.880304	0.000241304	0.0540273	0.00168593	0.00166678	4.72093e-05	0.282614	1.47187e-05	0.282601	3.01324	0.520963	0.883335	455.335
R.6067.8_d12	428.7	19.9	75	0.735022	3.74935e-05	1.47235	8.50476e-05	0.880524	0.000126214	0.187133	0.0157747	0.0048548	0.000250684	0.282625	1.48322e-05	0.282586	2.50806	0.524933	0.911874	483.174
R.5257.5_s10	434.2	5.9	73	0.736603	3.59138e-05	1.47543	9.93301e-05	0.878451	0.000123677	0.149894	0.00651974	0.00412782	0.000104908	0.282685	1.47822e-05	0.282651	4.93863	0.523179	0.781733	347.533
R.5257.5_s14	439.4	3.2	77	0.737091	4.36972e-05	1.47642	0.000117263	0.877917	0.000123359	0.152669	0.0180072	0.00349288	0.00040338	0.282606	1.73142e-05	0.282577	2.44345	0.612813	0.924259	484.859
R.5290.1_q06	439.7	4.6	100	0.7386	2.51442e-05	1.47954	6.66775e-05	0.876389	0.000162963	0.0710265	0.00503683	0.00323463	0.000165681	0.282672	1.23779e-05	0.282646	4.87202	0.438103	0.789956	350.256
R.6851.1_d09	462.4	4.5	115	0.739131	3.22972e-05	1.48063	0.00011803	0.875629	0.0001048	0.124967	0.00450637	0.00311822	8.70377e-05	0.282545	1.09585e-05	0.282518	0.870588	0.387884	1.03016	567.757
K7.557.1_i12a	579.8	13	33	0.735154	0.00012335	1.47272	0.000209329	0.88072	0.000309837	0.11216	0.00669315	0.00398903	0.000369808	0.28237	3.4629e-05	0.282326	-3.29156	1.22597	1.35626	776.463
K7.557.1_i12b	579.8	13	33	0.735078	9.99845e-05	1.47236	0.000206266	0.880896	0.000259844	0.100332	0.0030448	0.00291424	9.8553e-05	0.282384	2.18133e-05	0.282353	-2.36363	0.772284	1.30519	725.389
K7.557.1_n12a	604.6	7.2	25	0.737492	5.40676e-05	1.47732	0.000174612	0.877111	0.00017999	0.174757	0.00565509	0.00482643	0.000326559	0.282512	1.93524e-05	0.282457	1.89295	0.685142	1.09068	486.078
K7.557.1_n12b	604.6	7.2	55	0.735251	4.71548e-05	1.47276	0.000143215	0.880508	0.000221478	0.0995295	0.00277772	0.0030535	9.91671e-05	0.282463	1.57917e-05	0.282428	0.867196	0.559119	1.14738	542.783
R.6569.9_c12	643.1	11.4	80	0.735226	3.92749e-05	1.47273	8.88012e-05	0.880643	0.000328681	0.0844411	0.00676502	0.00259629	0.000170875	0.282421	1.78349e-05	0.28239	0.384311	0.631523	1.20573	562.633
R.5290.1_n13	751	5.8	110	0.738606	2.90498e-05	1.47949	6.77295e-05	0.876231	7.57983e-05	0.152134	0.00535409	0.00450849	5.87955e-05	0.282401	1.11948e-05	0.282337	0.932506	0.396452	1.26419	513.188
K7.557.1_i08a	966.2	21.4	35	0.735183	8.41639e-05	1.4726	0.000175827	0.880328	0.000166699	0.155383	0.0155147	0.00412441	0.000344861	0.282458	2.56438e-05	0.282383	7.41343	0.908554	1.08158	115.38
K7.557.1_i08b	966.2	21.4	15	0.734961	9.80973e-05	1.47217	0.000450418	0.880558	0.000162518	0.144423	0.00409663	0.00403018	0.000263786	0.282474	3.40342e-05	0.2824	8.03671	1.20583	1.04688	80.6829
